# Supplementary material for: A homozygous SFTPA1 mutation drives necroptosis of type II alveolar epithelial cells in patients with idiopathic pulmonary fibrosis
Source: PubMed Central journal article supplement — J Exp Med. 2019 Oct 10;216(12):2724–35. doi: 10.1084/jem.20182351 (PMC6888986; doi:10.1084/jem.20182351), 2019-10-10
Supplement: JEM_20182351_sm.pdf [file JEM_20182351_sm.pdf]

## Supplemental material

Takezaki et al., <https://doi.org/10.1084/jem.20182351>

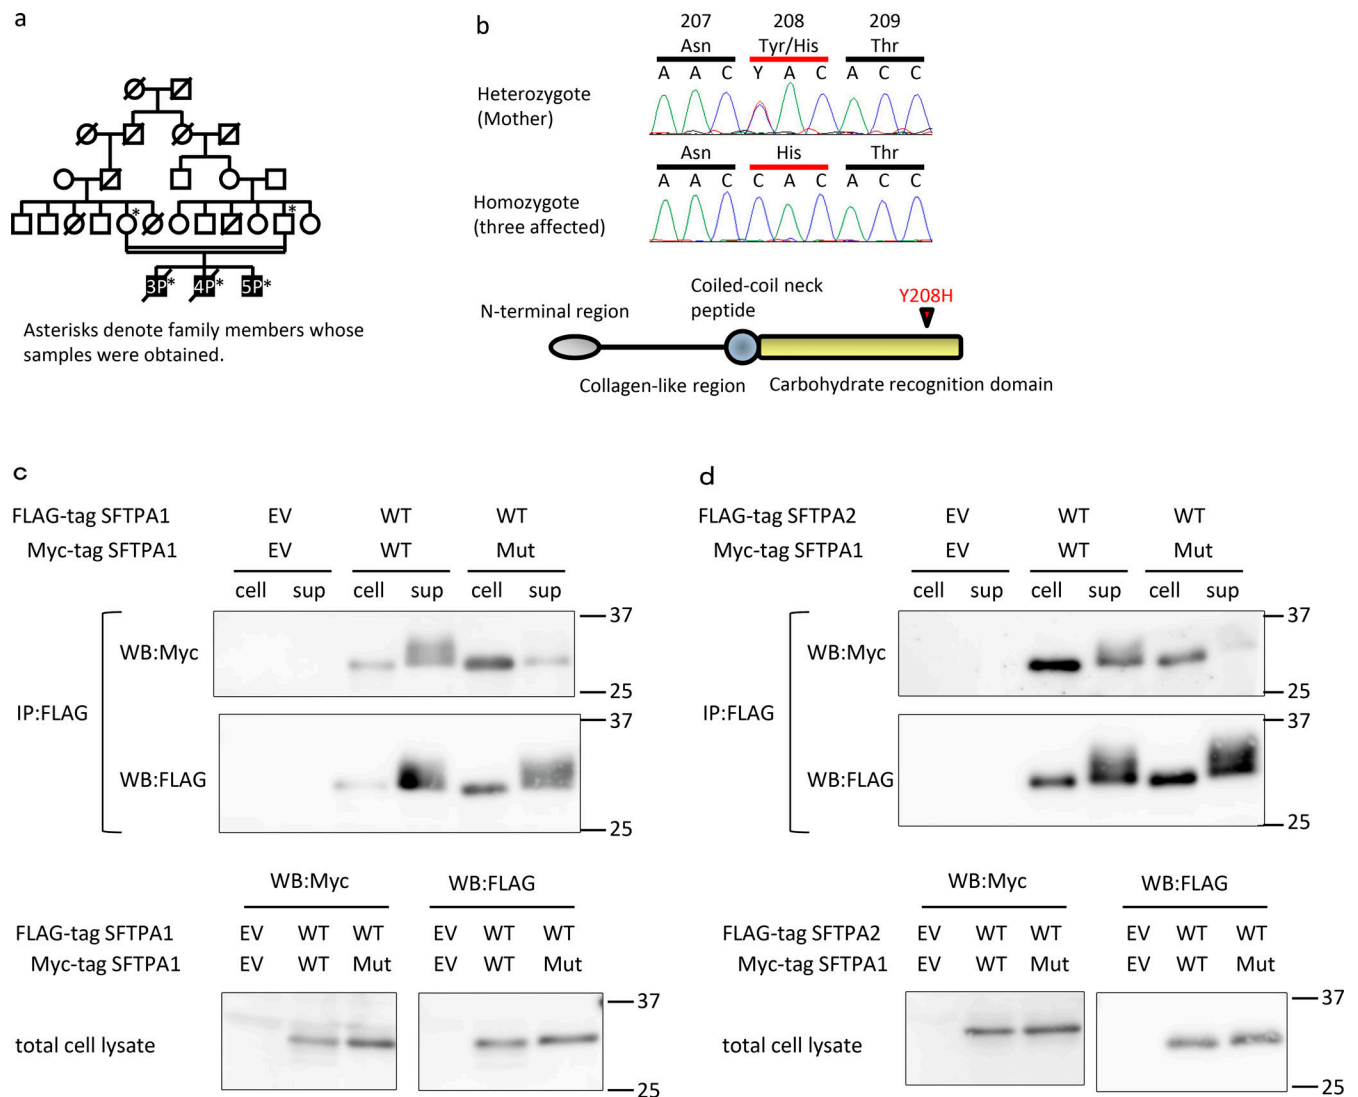

Figure S1. **Identification of an SFTP1 mutation in IPF patients and its effect on the secretion of SFTP1.** (a) Pedigree of a Japanese IPF family: double lines indicate consanguinity, filled black indicates IPF patients, and diagonal lines indicate deceased siblings. P, patient. (b) The heterozygous (parents) or homozygous (patients) missense mutation in *SFTP1* (Y208H) as shown by capillary sequencing. *SFTP1* protein domains: the red arrowhead indicates position of the missense mutation. (c and d) The Flag-tagged *SFTP1* and Myc-tagged *SFTP1* (c; WT or mutant [Mut]) or Flag-tagged *SFTP2* and Myc-tagged *SFTP1* (d; WT or Mut) cDNA was transfected into A549 cells. As a negative control, empty vector (EV) was transfected. 1 d after transfection, the cell pellets (cell) or supernatant (sup) were immunoprecipitated with anti-Flag antibody, and the immunoprecipitates were blotted with an anti-Flag or Myc antibody. As a control, total cell lysates were blotted with the anti-Flag or Myc antibody. WB, Western blot. Data shown are representative of five (c and d) independent experiments.



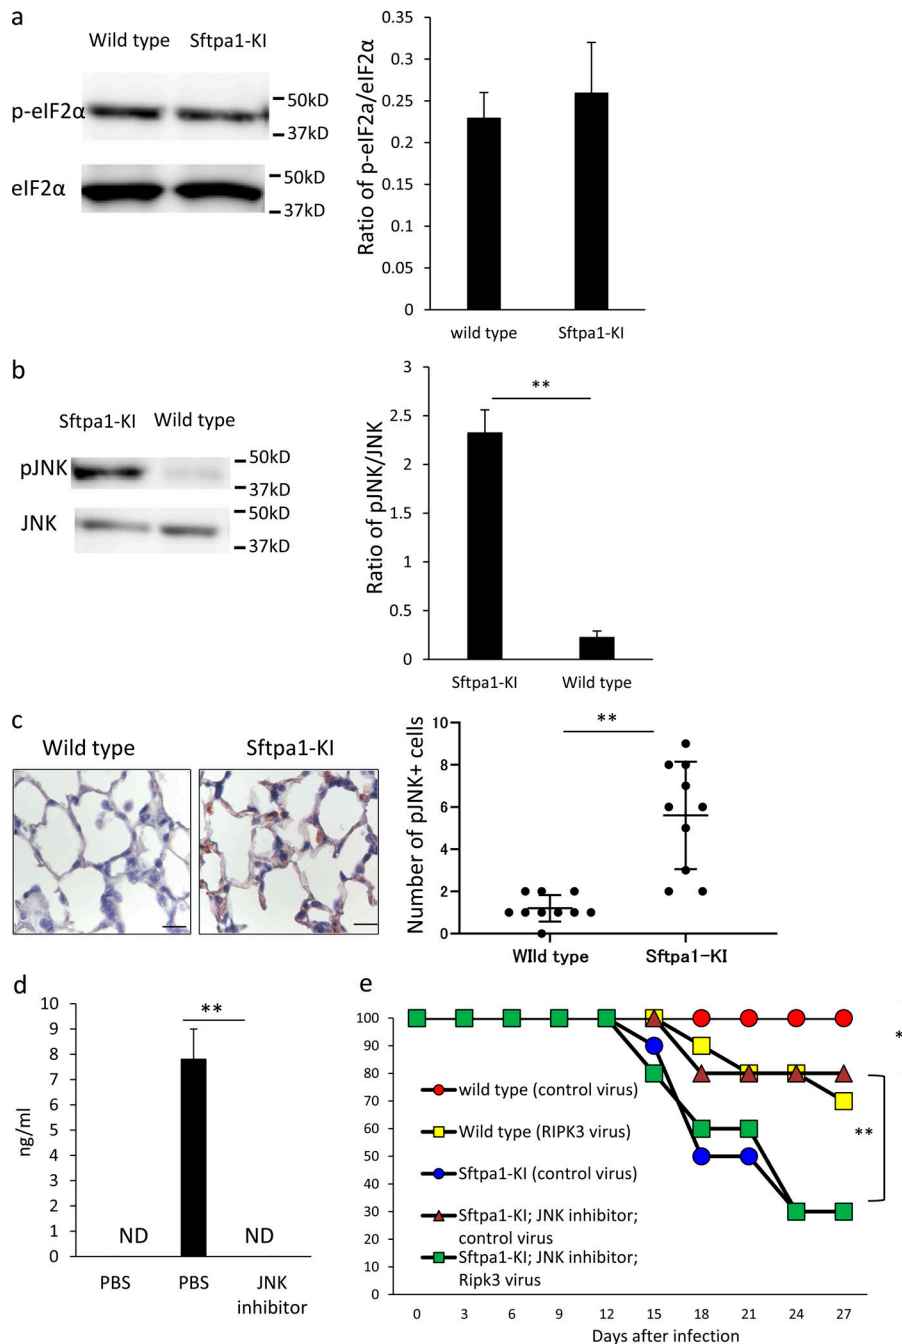

**Figure S3. The inhibition of JNK blocks pulmonary fibrosis.** (a and b) The expression of phosphorylated eIF2 $\alpha$  (a) or phosphorylated JNK (b) in WT or Sftpa1-KI mice at the age of 35 wk was evaluated by Western blotting. Data are means  $\pm$  SD. \*\*,  $P < 0.01$ . (c) The expression of pJNK in WT or Sftpa1-KI mice at the age of 30 wk was evaluated by immunohistochemistry. The pJNK-positive cells (average of the number of pJNK-positive cells in 10 independent fields in right lung) was counted. Data are means  $\pm$  SD. \*\*,  $P < 0.01$ . The scale bar indicates 20  $\mu$ m. (d) WT mice were injected with LPS (50  $\mu$ g), and serum TNF $\alpha$  was measured 3 h after LPS injection. The JNK inhibitor (30 mg/kg, s.c.) was administered 3 h before LPS injection. Data are means  $\pm$  SD. \*\*,  $P < 0.01$ . The data are representative of two independent experiments. (e) This is an additional set of experiments for Fig. 3 b. Survival of 20-wk-old WT (red circles), WT infected with adenovirus carrying *Ripk3* (yellow squares), Sftpa1-KI mice infected with control virus (blue circles), Sftpa1-KI mice infected with control virus and treated with a JNK inhibitor (brown triangles), or Sftpa1-KI mice infected with *Ripk3*-adenovirus and treated with a JNK inhibitor (green squares; number of mice in each independent experiment is 10). \*,  $P < 0.05$ ; \*\*,  $P < 0.01$  by log rank test. Data shown are representative of five (a–d) independent experiments.
